# Supplementary material for: A Novel Score to Predict One-Year Mortality after Transcatheter Aortic Valve Replacement, Naples Prognostic Score
Source: MDPI journal article supplement (doi:10.3390/medicina59091666), 2023-09-15
Supplement: s1 [file s1]

Supplement: Table S1. Univariate Analysis Appendices

| Variable          | p      | EXP   | 95% C.I.for EXP |       |
|-------------------|--------|-------|-----------------|-------|
|                   |        |       | Lower           | Upper |
| Age               | 0.332  | 1.027 | 0.973           | 1.084 |
| Euroscore         | <0.001 | 1.056 | 1.026           | 1.086 |
| LvEF              | 0.983  | 1.000 | 0.972           | 1.028 |
| Hemoglobin        | 0.028  | 0.780 | 0.626           | 0.974 |
| Platelet count    | 0.226  | 1.000 | 1.000           | 1.000 |
| Neutrophil        | 0.110  | 1.000 | 1.000           | 1.000 |
| Lymphocyte        | 0.317  | 1.000 | 0.999           | 1.000 |
| Monocyte          | 0.045  | 1.002 | 1.000           | 1.000 |
| Creatinine        | 0.134  | 1.809 | 0.883           | 3.928 |
| Total Cholesterol | 0.530  | 1.003 | 0.995           | 1.011 |
| LDL               | 0.103  | 1.008 | 0.998           | 1.017 |
| HDL               | 0.090  | 0.971 | 0.939           | 1.005 |
| Triglycerid       | 0.838  | 1.001 | 0.995           | 1.006 |
| Total protein     | 0.006  | 0.942 | 0.903           | 0.983 |
| Albumin           | <0.001 | 0.887 | 0.821           | 0.938 |
| NLR               | 0.090  | 1.078 | 0.988           | 1.175 |
| LMR               | 0.008  | 0.690 | 0.525           | 0.906 |
| Gender            | 0.102  | 1.841 | 0.886           | 3.824 |
| DM                | 0.773  | 1.112 | 0.539           | 2.297 |
| HT                | 0.371  | 1.957 | 0.450           | 8.507 |
| AF                | 0.022  | 2.347 | 1.130           | 4.874 |
| SVO               | 0.383  | 1.646 | 0.537           | 5.038 |
| COPD              | 0.062  | 2.037 | 0.965           | 4.299 |
| PCI               | 0.370  | 0.693 | 0.311           | 1.545 |
| CABG              | 0.293  | 1.576 | 0.675           | 3.681 |
| Balon exp         | 0.961  | 1.019 | 0.475           | 2.190 |
| Naples group      | 0.008  | 2.859 | 1.313           | 6.222 |
